# Supplementary material for: Subsequent Upper Urinary Tract Carcinoma Related to Worse Survival in Patients Treated with BCG
Source: MDPI journal article supplement (doi:10.3390/cancers15072002), 2023-03-28
Supplement: s1 [file s1]

Supplement Figure S1. Selection of patients. Of 3226 patients with non-muscle invasive bladder cancer treated by BCG bladder instillation therapy, we analyzed 2873 patients who recorded history with or without subsequent diagnosis with upper urinary tract carcinoma.

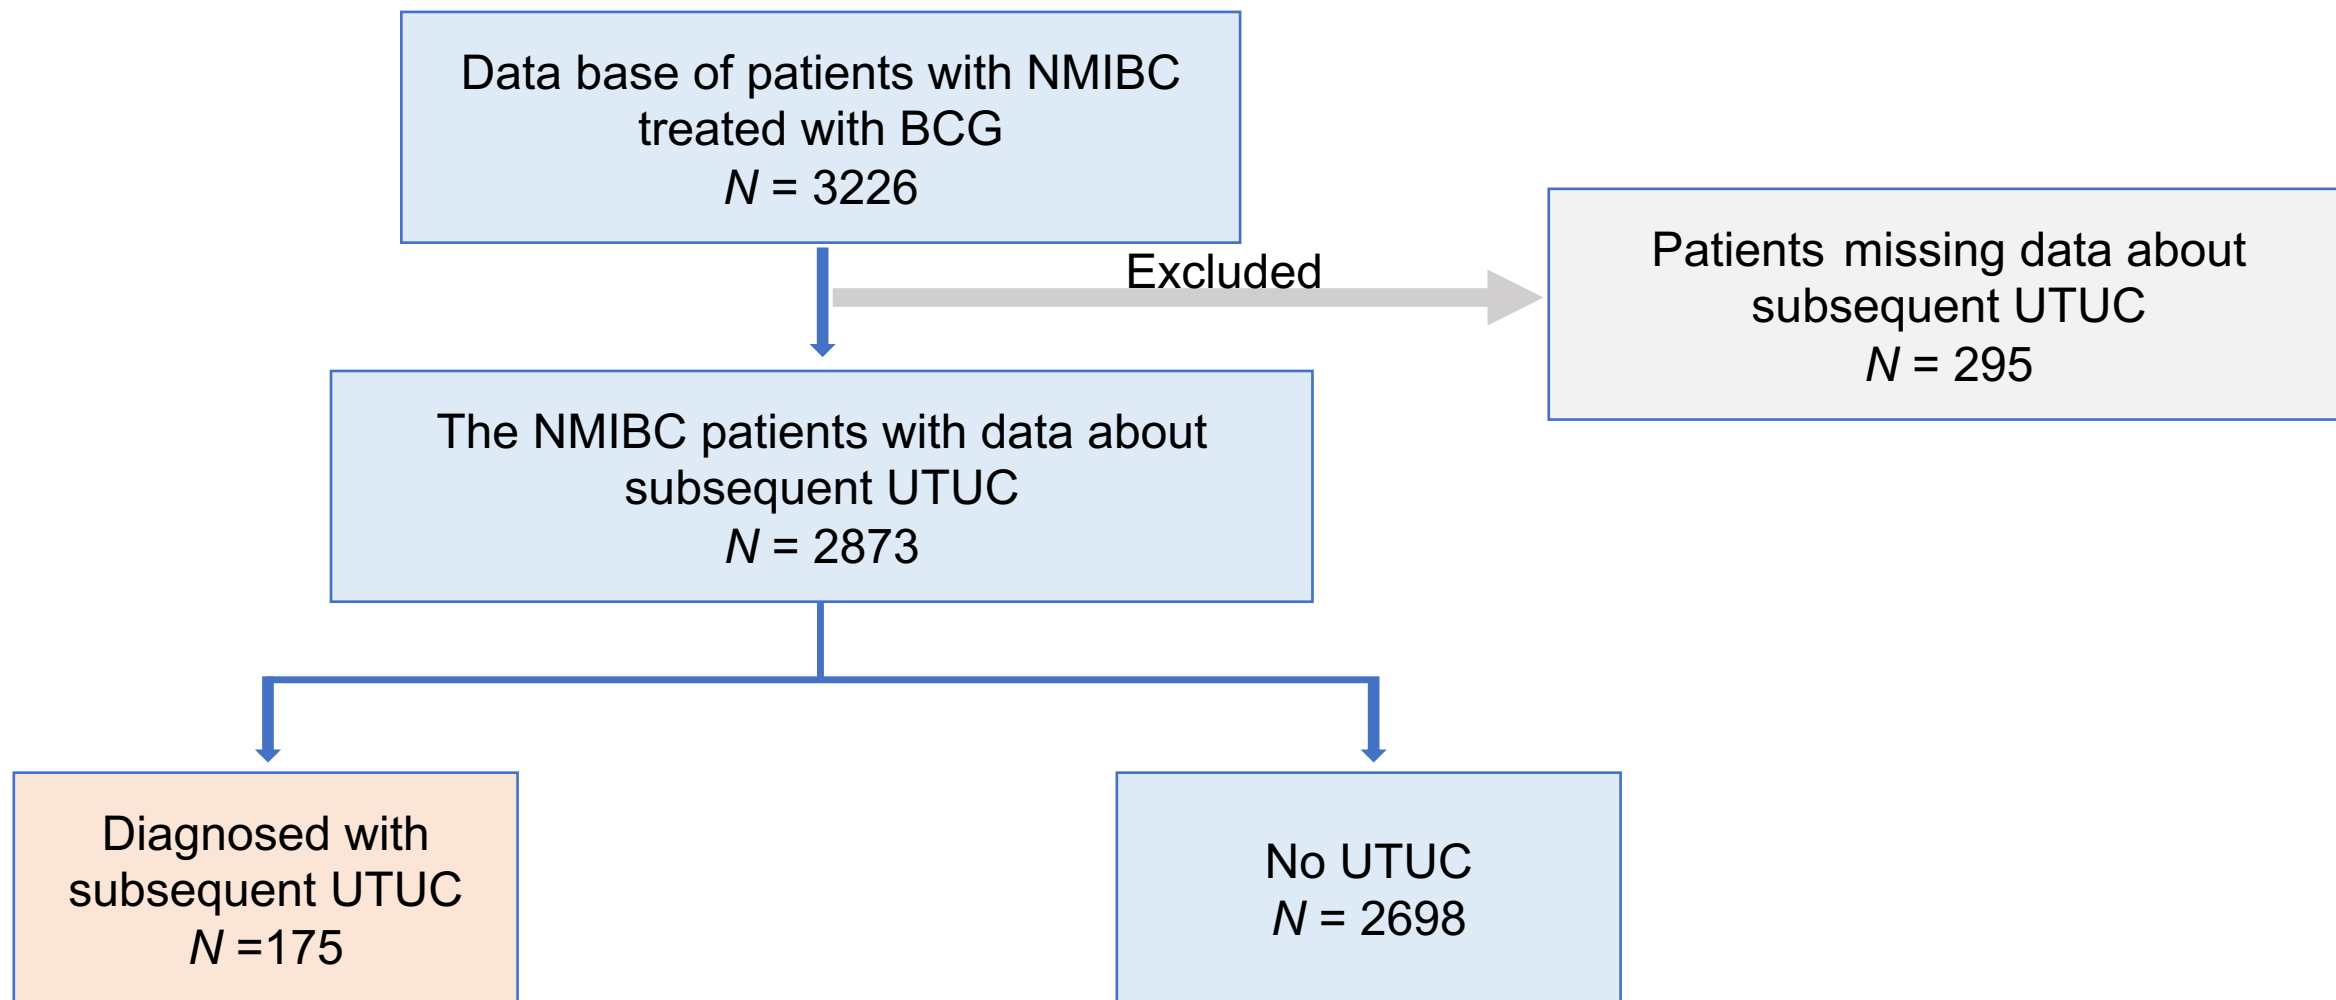

NMIBC, non-muscle invasive bladder cancer ; BCG, bacillus Calmette-Guerin ; UTUC, upper urinary tract carcinoma
